# Supplementary material for: The miR-17/92 Polycistron Is Up-regulated in Sonic Hedgehog–Driven Medulloblastomas and Induced by N-myc in Sonic Hedgehog–Treated Cerebellar Neural Precursors
Source: Oxford University Press journal article supplement (doi:10.1158/0008-5472.can-08-4710), 2009-04-07
Supplement: 00085472can084710-sup-stab_1.xls [file 00085472can084710-sup-stab_1.xls]

## Sheet: Sheet1
Unique id	Mature miRNA	Parametric p-value	t-value	Medulloblastoma (log2 expression)	Cerebellum (log2 expression)	Fold-Change (Medullobatoma/Cerebellum)
hsa-mir-093-prec-7.1=093-1	miR-93	<1.00E-07	-8.262	12.4406	10.2519	4.55899
hsa-mir-025-prec	miR-25	<1.00E-07	-7.21	13.7033	11.7973	3.74775
hsa-mir-017-precNo2	miR-17	<1.00E-07	-7.03	13.9483	11.7258	4.66728
hsa-mir-092-prec-13=092-1No2	miR-92a	<1.00E-07	-6.718	15.6137	14.7164	1.86261
hsa-mir-130a-precNo2	miR-130a	<1.00E-07	-6.672	14.0414	12.4226	3.0713
hsa-mir-130bNo1	miR-130b	<1.00E-07	-6.285	12.5702	11.0575	2.85351
hsa-mir-092-prec-X=092-2	miR-92a	<1.00E-07	-6.266	15.5544	14.4061	2.21656
hsa-mir-106-prec-X	miR-106a	<1.00E-07	-6.168	13.0391	10.7444	4.90653
hsa-mir-20bNo1	miR-20b	<1.00E-07	-6.14	12.7261	10.6353	4.25987
hsa-mir-106aNo1	miR-106a	<1.00E-07	-5.842	12.6257	10.556	4.1981
hsa-mir-106bNo1	miR-106b	<1.00E-07	-5.757	12.2467	10.3029	3.84707
hsa-mir-219-2No2	miR-219-2-3p	<1.00E-07	7.623	8.30501	10.2685	0.256411
hsa-mir-129-precNo2	miR-129*	<1.00E-07	6.641	8.56299	10.641	0.236847
hsa-mir-138-1-prec	miR-138	<1.00E-07	6.628	8.49004	11.0717	0.16705
hsa-mir-138-2-prec	miR-138	<1.00E-07	6.396	8.9281	10.7816	0.276724
hsa-mir-129-2No2	miR-129-3p	<1.00E-07	6.193	7.19652	9.44786	0.210029
hsa-mir-219-2No1	miR-219-5p	<1.00E-07	5.864	5.58228	8.12896	0.171148
hsa-mir-129-precNo1	miR-129-5p	1e-07	5.675	9.39119	10.8201	0.371407
hsa-mir-133a-2	miR-133a	1e-07	5.728	5.65886	7.40665	0.297758
hsa-mir-020-prec	miR-20a	2e-07	-5.581	13.4375	11.3226	4.33186
hsa-mir-329-1No1	miR-329	6e-07	5.361	4.98831	6.31536	0.398583
hsa-mir-128b-precNo1	miR-128a/b	1e-06	5.21	12.1656	14.3638	0.217912
hsa-mir-021-prec-17No1	miR-21	1.1e-06	-5.195	11.216	9.27622	3.83649
hsa-mir-018-prec	miR-18a	2e-06	-5.058	9.51217	7.46019	4.14676
hsa-mir-133a-1	miR-133a	2e-06	5.049	6.23568	7.72842	0.355336
hsa-mir-216-precNo2	miR-216a	2.5e-06	-4.999	8.81721	6.00212	7.03762
hsa-mir-34bNo2	miR-34b	3.4e-06	4.928	6.42615	7.55713	0.456604
hsa-mir-128a-precNo2	miR-128a/b	3.8e-06	4.903	13.008	14.8997	0.269484
hsa-mir-345No1	miR-345	4.9e-06	-4.839	10.2472	8.86073	2.6143
hsa-mir-433No1	miR-433	5.6e-06	4.802	6.43359	7.96481	0.345985
hsa-mir-019b-2-prec	miR-19b	6.8e-06	-4.755	10.306	8.73969	2.96136
hsa-mir-135-2-prec	miR-135a	1.33e-05	-4.587	11.3202	9.64617	3.19097
hsa-mir-496No1	miR-496	3.53e-05	4.335	5.75858	6.98964	0.426004
hsa-mir-21No1	miR-21	4.81e-05	-4.254	10.6334	8.58997	4.12225
hsa-mir-1-2No1	miR-1	4.92e-05	4.248	5.20893	6.24398	0.487998
hsa-mir-409-5p	miR-409-5p	6.5e-05	4.174	4.96328	5.6632	0.615604
hsa-mir-129-2No1	miR-129-5p	6.82e-05	4.161	9.38324	10.461	0.473776
hsa-mir-130a-precNo1	miR-130a*	8.54e-05	4.1	6.62905	8.08292	0.365041
hsa-mir-019b-1-prec	miR-19b	8.97e-05	-4.086	9.62999	7.94489	3.21563
hsa-mir-218-2-precNo2	miR-218	0.0001121	4.026	9.12622	10.58	0.365062
hsa_mir_320_Hcd306 left	miR-320	0.0001553	-3.936	9.37404	8.86045	1.42759
hsa-mir-033-prec	miR-33a	0.000233	-3.821	6.83663	5.53806	2.45985
hsa-let-7e-prec	let-7e	0.0002331	3.821	11.472	12.114	0.640802
hsa-mir-019a-prec	miR-19a	0.000253	-3.798	8.3282	6.88561	2.71808
Hcd213_HPR182 left	miR-539	0.0002531	3.798	6.38455	8.5159	0.228244
hsa-mir-379No1	miR-379	0.0002668	3.783	7.10016	8.49532	0.380202
hsa-mir-338No2	miR-338-5p	0.0003454	3.709	7.99535	9.45146	0.364474
hsa-mir-096-prec-7No1	miR-96*	0.0004077	-3.661	8.31646	6.54031	3.42511
hsa-mir-489No1	miR-489	0.0004113	3.658	5.09386	5.83775	0.597125
hsa-mir-15aNo2	miR-15a*	0.0004508	3.631	4.85821	5.30388	0.734242
hsa-mir-099b-prec-19No1	miR-99b*	0.0005218	-3.588	8.96937	8.26899	1.62493
hsa-mir-007-2-precNo1	miR-7-2*	0.0005229	3.588	6.67736	7.81926	0.453161
hsa-mir-218-1-prec	miR-218	0.0005423	3.577	7.81595	9.57526	0.29539
hsa-mir-096-prec-7No2	miR-96	0.0005667	-3.564	11.3141	10.3279	1.98096
hsa-mir-453No1	miR-453	0.0006204	-3.537	7.36067	6.61949	1.67155
hsa-mir-210-prec	miR-210	0.0006821	-3.509	9.15004	8.04556	2.15022
hsa-mir-410No1	miR-410	0.0007605	3.476	8.00188	9.53981	0.344378
hsa-mir-200cNo2	miR-200c*	0.0007659	-3.474	6.57831	5.64379	1.91125
hsa-mir-4325p	miR-432	0.0007826	3.467	6.15912	7.44763	0.409374
hsa-mir-329-2No1	miR-329	0.0008013	3.46	5.11359	6.11129	0.500799
hsa-mir-183-precNo1	miR-183	0.0009685	-3.402	7.86547	6.03337	3.56054
hsa-mir-382	miR-382	0.0011148	3.359	8.24049	9.83744	0.330575
hsa-mir-383No1	miR-383	0.0012447	3.325	7.25278	8.10777	0.55287
hsa-mir-140No1	miR-140-5p	0.0013848	3.292	5.56699	6.37428	0.571453
hsa-mir-519c/526c	miR-518e*	0.0016153	3.243	4.61913	4.84499	0.855085
hsa-mir-323No1	miR-323-3p	0.0024509	3.11	7.92863	9.84396	0.265111
hsa-mir-380-3p	miR-380	0.0024585	3.109	5.33084	6.51084	0.441351
hsa-mir-032-precNo2	miR-32	0.0026482	-3.085	10.1361	8.93312	2.30218
hsa-mir-217-precNo2	miR-217	0.0028872	-3.056	7.00241	5.54485	2.74645
hsa-mir-16-1No1	miR-16	0.0028884	-3.056	12.2462	11.5198	1.65458
hsa-let-7iNo1	let-7i	0.0030776	3.035	11.1542	11.7235	0.673948
hsa-mir-124a-2-prec	miR-124	0.0030893	3.034	10.4992	11.7714	0.41402
hsa-mir-342No2	miR-342-5p	0.0034076	-3.002	8.28189	7.81178	1.38521
hsa-mir-328No1	miR-328	0.0035625	-2.987	10.0942	9.6942	1.31953
hsa-mir-29b-2=102prec7.1=7.2	miR-29b	0.0036334	2.98	9.20825	10.0753	0.54826
hsa-mir-518bNo1	miR-518b	0.0036856	2.975	4.63234	5.00874	0.770358
hsa-mir-299No1	miR-299-5p	0.0037404	2.97	7.74519	9.35081	0.328595
hsa-mir-134-precNo2	miR-134	0.003768	2.968	9.51452	10.6561	0.453257
hsa-mir-376aNo1	miR-376a	0.0044295	2.913	8.00743	9.64277	0.321896
hsa-mir-034precNo1	miR-34a	0.0052942	-2.852	8.81822	8.15297	1.58583
hsa-mir-497No1	miR-497	0.0060388	-2.807	10.6489	9.95722	1.61516
hsa-mir-16-2No2	miR-16-2*	0.0065183	-2.78	7.68909	6.71671	1.96207
hsa-miR-302c*No1	miR-302c*	0.0070945	2.75	5.56014	6.34087	0.582071
hsa-mir-029c-prec	miR-29c	0.00716	2.747	9.93595	10.7434	0.571378
hsa-mir-517c*	miR-517*	0.0073183	2.739	4.82015	5.25197	0.741326
hsa-let-7d-v2-precNo2	let-7i	0.0074052	2.735	11.4376	12.0008	0.676787
hsa-mir-101-prec-9	miR-101	0.0079417	-2.71	8.67321	7.83505	1.78777
Hcd311 right	miR-875-5p	0.0080815	2.704	4.69814	4.93931	0.846059
hsa-mir-29b-1No1	miR-29b	0.0082383	2.697	9.22451	10.0701	0.556467
hsa-mir-219-prec	miR-219-5p	0.0084848	2.686	7.24803	8.28239	0.488233
hsa-mir-124a-1-prec1	miR-124	0.0087924	2.674	10.6861	11.6864	0.499897
hsa-mir-376bNo1	miR-376b	0.0097295	2.637	6.63162	8.05389	0.373126
Hcd972 right	miR-542-5p	0.010059	-2.625	6.32847	5.71403	1.53096
hsa-mir-302bNo2	miR-302b*	0.0100788	2.624	4.81548	5.1117	0.814381
hsa-mir-181a-precNo2	miR-181a-2*	0.0102367	2.618	7.8365	8.38818	0.682225
hsa-mir-495No1	miR-495	0.0117359	2.568	8.37271	10.0392	0.31502
hsa-mir-150-prec	miR-150	0.0124277	2.547	9.25611	9.6772	0.746859
hsa-mir-368No1	miR-376c	0.012575	2.542	7.2027	8.81287	0.327558
hsa-mir-487No1	miR-487a	0.0131714	2.525	8.06643	8.68624	0.65076
hsa-mir-15aNo1	miR-15a	0.0137558	-2.509	10.882	10.1701	1.63801
hsa-mir-182-precNo2	miR-182	0.0145739	-2.487	8.1637	5.88115	4.86537
hsa-mir-346No1	miR-346	0.0146362	-2.485	10.3123	9.89634	1.33423
hsa-mir-124a-3-prec	miR-124	0.0148931	2.479	10.6411	11.5801	0.521603
hsa-mir-029a-2No1	miR-29a	0.0160757	2.45	9.78528	10.673	0.540455
hsa-mir-493No2	miR-493	0.016517	-2.439	6.7418	6.04847	1.61701
hsa-mir-34cNo2	miR-34c-3p	0.0181379	2.403	7.80376	8.29806	0.709907
Hcd280 left	miR-147b	0.0181765	2.402	4.63934	4.8313	0.875419
hsa-mir-196a-1No1	miR-196a	0.0185133	-2.395	10.8939	10.3451	1.46285
Hcd43 left	miR-671-5p	0.0188103	-2.389	8.24512	7.85245	1.31282
hsa-mir-34aNo1	miR-34a	0.0195042	-2.375	9.00662	8.59909	1.32641
hsa-mir-202*	miR-202*	0.0195628	-2.374	12.1291	11.4826	1.56537
hsa-mir-016b-chr3	miR-16	0.0206873	-2.352	12.4743	11.8688	1.5215
hsa-mir-001b-2-prec	miR-1	0.0212465	2.341	6.1097	6.88175	0.585585
hsa-mir-130bNo2	miR-130b*	0.0225932	-2.317	9.97312	9.61887	1.27832
hsa-mir-30c-1No2	miR-30c-1*	0.0235723	-2.3	7.76694	7.25847	1.42254
hsa-mir-017-precNo1	miR-17*	0.0238504	-2.295	9.1388	8.50221	1.55465
hsa-mir-154-prec1No2	miR-154*	0.0246503	2.282	5.77171	6.64206	0.547014
hsa-mir-135a-1No1	miR-135a	0.0248666	-2.279	10.9052	9.96126	1.92374
hsa-mir-326No1	miR-326	0.0263407	-2.255	7.69105	7.13013	1.47521
hsa-mir-409-3p	miR-409-3p	0.0265177	2.253	7.02036	8.03114	0.49628
hsa-mir-183-precNo2	miR-183*	0.0268685	-2.247	6.12959	4.86742	2.39855
hsa-mir-16-2No1	miR-16	0.0282336	-2.227	12.2303	11.6712	1.47335
hsa-mir-200bNo1	miR-200b	0.0300093	-2.202	6.13595	5.59012	1.45986
hsa-mir-102-prec-1	miR-29b	0.0311897	2.186	10.2129	10.9937	0.582056
hsa-mir-339No1	miR-339-5p	0.032005	-2.175	7.15542	6.56841	1.50214
hsa-mir-429No1	miR-429	0.0322933	2.172	8.40329	8.7946	0.762433
Hcd14 left	miR-208b	0.0327166	2.166	8.97178	9.45395	0.715898
hsa-mir-379No2	miR-379*	0.0336033	2.155	6.36811	6.95901	0.663925
hsa-let-7g-precNo1	let-7g	0.0344465	2.145	10.8416	11.3719	0.692383
hsa-mir-016a-chr13	miR-16	0.0365022	-2.12	12.1679	11.5829	1.50002
HPR268 right	miR-18b*	0.0371997	-2.112	5.54043	5.12909	1.32991
hsa-mir-196a-2No1	miR-196a	0.0391473	-2.091	8.6429	8.1233	1.43356
Hcd644_HPR241 left	miR-653	0.042126	2.059	4.64524	4.81465	0.889203
hsa-let-7f-1-precNo2	let-7f	0.0435708	2.045	9.17171	9.74359	0.672741
hsa-mir-200bNo2	miR-200b*	0.0436194	-2.044	7.13379	6.49617	1.55576
hsa-mir-26a-2No1	miR-26a	0.0438017	2.042	13.5311	14.0496	0.698077
hsa-mir-202	miR-202	0.0450607	-2.03	6.63594	6.11785	1.43206
hsa-mir-193-precNo2	miR-193a-5p	0.0457067	-2.024	9.03873	8.46586	1.48748
hsa-mir-030d-precNo1	miR-30d*	0.0457309	2.024	6.66172	7.36597	0.613763
hsa-mir-015b-precNo1	miR-15b	0.0460963	-2.02	10.1064	9.35899	1.67872
hsa-mir-127-prec	miR-127-3p	0.0476708	2.005	9.31274	9.82994	0.698726
hsa-mir-26a-1No1	miR-26a	0.0486267	1.997	14.2336	14.5905	0.780789
hsa-mir-181a-precNo1	miR-181a	0.049467	1.989	12.1645	12.8979	0.601455
hsa-mir-330No2	miR-330-5p	0.0500469	-1.984	6.35941	5.79664	1.47709
hsa-mir-028-prec	miR-28-5p	0.0530628	1.958	6.99912	7.78572	0.57971
hsa-mir-423No2	miR-423-5p	0.0533403	-1.956	11.4818	11.1981	1.21729
hsa-mir-024-1-precNo2	miR-24-1*	0.0536278	1.953	7.47833	8.05566	0.670203
hsa-mir-18bNo1	miR-18b	0.0537319	1.953	5.08864	5.49443	0.75482
hsa-mir-380-5p	miR-380*	0.0561538	1.933	4.69672	4.8496	0.899456
hsa-mir-148aNo1	miR-148a	0.0562729	-1.932	7.24907	6.12991	2.17219
hsa-mir-431No1	miR-431	0.0565663	1.929	4.85045	5.09008	0.846964
hsa-mir-219-1No1	miR-219-5p	0.0579004	1.919	7.89105	8.61368	0.60599
hsa-mir-015a-2-precNo1	miR-15a	0.0604059	-1.9	11.073	10.5	1.48753
hsa_mir_95 left	miR-95	0.0607963	-1.897	5.72948	5.37009	1.28288
hsa-mir-296No2	miR-296-3p	0.0608235	-1.897	5.75232	5.3468	1.32457
hsa-mir-513-1No1	miR-513-5p	0.0620794	1.887	4.85326	5.04935	0.872912
hsa-mir-515-13p	miR-515-3p	0.0647777	1.868	5.5109	5.90791	0.759431
hsa-mir-205-prec	miR-205	0.0657939	1.861	7.824	8.10034	0.825683
hsa-mir-374No2	miR-374a*	0.0693759	1.836	4.64577	4.77801	0.91241
hsa-mir-522/526c	miR-518e*	0.0712316	1.824	4.62505	4.70724	0.944626
hsa-mir-135-1-prec	miR-135a	0.0715515	-1.822	10.6706	9.6868	1.97765
hsa-mir-518d/526a	miR-518d-5p	0.0736085	1.808	4.64488	4.7987	0.898864
hsa-mir-506No1	miR-506	0.0765056	1.79	4.70031	4.89847	0.871663
hsa-mir-099-prec-21	miR-99a	0.078165	-1.78	13.8048	13.3759	1.34616
hsa-mir-105-2No2	miR-105*	0.0784782	-1.778	6.98296	6.48441	1.4128
hsa_mir_490_Hcd20 left	miR-490-3p	0.0793098	1.773	4.67779	4.80251	0.917182
hsa-mir-518a-1*	miR-518a-5p	0.0823248	1.755	5.02548	5.30746	0.822464
hsa-mir-135bNo1	miR-135b	0.0825704	-1.754	9.80768	8.72902	2.11207
Hcd88_HPR103 left	miR-582-3p	0.0842028	-1.745	7.01442	5.90174	2.16247
Hcd212_HPR202 left	miR-487b	0.0844315	1.743	4.70868	4.86445	0.897655
hsa-mir-486	miR-486-5p	0.0860057	1.734	10.1858	10.9494	0.589028
hsa-mir-101-1/2-precNo2	miR-101	0.0867936	-1.73	8.42714	7.85204	1.48978
hsa-mir-375	miR-375	0.0876751	-1.725	9.01621	7.80877	2.30927
hsa-mir-520a	miR-520a-3p	0.0878208	-1.724	5.47435	5.17753	1.22843
hsa-mir-135a-2No1	miR-135a	0.0883298	-1.721	10.2922	9.34469	1.92861
hsa-mir-331No1	miR-331-3p	0.0896946	1.714	6.30677	6.95254	0.639155
hsa-mir-518a-2	miR-518a-3p	0.0932836	-1.695	5.73477	5.38123	1.27769
hsa-mir-010a-precNo2	miR-10a*	0.0945733	1.688	5.6308	6.09036	0.727208
hsa-mir-181b-precNo1	miR-181a	0.0947346	1.687	12.1261	12.7819	0.634727
hsa-mir-196bNo1	miR-196b	0.0952543	-1.685	6.43093	5.72554	1.63058
hsa-mir-154-prec1No1	miR-154	0.0986815	1.667	5.08087	5.43709	0.781209
hsa-mir-148aNo2	miR-148a*	0.103078	-1.645	5.80373	5.46435	1.26522
hsa-mir-337No1	miR-337-3p	0.103231	1.645	6.20817	6.79847	0.664203
hsa-mir-022-prec	miR-22	0.104386	1.639	6.43119	6.93179	0.706816
hsa-mir-212-precNo1	miR-212	0.104656	-1.638	10.603	10.2456	1.28115
hsa-mir-144-precNo2	miR-144*	0.104812	1.637	5.0912	5.4246	0.793662
hsa-mir-363No1	miR-363	0.104987	1.636	6.53059	7.06485	0.690512
hsa-miR-126*No2	miR-126	0.105386	1.634	8.52727	9.02103	0.710173
hsa-mir-491No2	miR-491-3p	0.106922	1.627	5.74324	6.14	0.759558
hsa-mir-149-prec	miR-149	0.107601	1.624	8.36437	8.74757	0.766732
hsa-mir-372No1	miR-372	0.108979	-1.618	5.80665	5.44722	1.28292
Hcd371 right	miR-708*	0.10954	-1.615	5.66127	5.29823	1.28614
hsa-mir-507No1	miR-507	0.11114	-1.608	5.09423	4.77157	1.25064
hsa-mir-026b-prec	miR-26b	0.11344	1.597	14.6468	14.9509	0.809959
hsa-mir-488No2	miR-488	0.122158	1.559	5.00918	5.2958	0.819821
hsa-mir-148-prec	miR-148a	0.122266	-1.559	7.80635	6.92482	1.84232
hsa-let-7f-2-prec2	let-7f	0.124247	1.55	9.61181	10.1419	0.692496
hsa-mir-365-2No1	miR-365	0.124583	1.549	6.01591	6.61444	0.660427
hsa-mir-491No1	miR-491-5p	0.126022	1.543	5.23611	5.54747	0.805881
hsa-mir-126No1	miR-126*	0.126559	1.541	8.22271	8.81317	0.664133
hsa-mir-499No1	miR-499-5p	0.129624	-1.528	8.4533	8.05006	1.32248
hsa-mir-499No2	miR-499-3p	0.130347	-1.526	5.67911	5.32112	1.28164
hsa-mir-106bNo2	miR-106b*	0.131054	1.523	7.07406	7.63686	0.676987
hsa-mir-509No1	miR-509-3p	0.133015	1.515	4.65563	4.75413	0.934
hsa-mir-525*	miR-525-3p	0.134433	1.509	5.77092	6.27799	0.703649
hsa-mir-197-prec	miR-197	0.135453	1.505	11.4958	11.7112	0.861315
hsa-mir-324No2	miR-324-5p	0.136053	-1.503	9.28399	8.9704	1.2428
hsa-mir-18bNo2	miR-18b*	0.137041	-1.499	4.85841	4.70699	1.11066
hsa-mir-125a-precNo2	miR-125a-3p	0.138615	-1.493	7.65108	7.21587	1.35211
hsa-mir-194-2No1	miR-194	0.13934	-1.49	9.39947	9.09229	1.23728
hsa-mir-142-prec	miR-142-5p	0.141336	1.483	6.44514	7.03372	0.664998
hsa-mir-512-1&25p	miR-512-5p	0.147979	1.458	4.73737	4.89197	0.898378
hsa-mir-137-prec	miR-137	0.148057	-1.458	7.93675	6.90745	2.04103
hsa-mir-185-precNo2	miR-185*	0.148573	-1.456	9.11858	8.88952	1.17207
hsa-mir-369No1	miR-369-3p	0.148968	1.455	8.3894	8.93995	0.682759
hsa-mir-135a-1No2	miR-135a*	0.150468	-1.449	5.44728	5.04578	1.32088
hsa-miR-126*No1	miR-126	0.159514	-1.417	11.7125	11.3474	1.28798
hsa-mir-34bNo1	miR-34b*	0.163061	-1.405	6.78796	6.26329	1.4386
hsa-mir-203-precNo1	miR-203	0.164129	-1.402	8.11354	7.23327	1.84071
hsa-mir-099b-prec-19No2	miR-99b	0.164414	1.401	12.8177	13.1373	0.801298
hsa-mir-373No2	miR-373*	0.165052	-1.399	10.8435	10.4729	1.29285
hsa-mir-30eNo1	miR-30e	0.170319	1.381	11.1401	11.4933	0.782879
hsa-mir-193-precNo1	miR-193a-3p	0.170473	-1.381	6.22387	5.82112	1.32203
hsa-mir-381No1	miR-381	0.172868	1.373	5.15407	5.50229	0.785552
hsa-mir-126No2	miR-126*	0.174475	-1.368	12.4599	12.1296	1.25724
hsa-mir-323No2	miR-323-5p	0.180322	1.349	9.79033	10.1247	0.793126
hsa-mir-152-precNo1	miR-152	0.180584	1.349	8.55181	8.83849	0.819783
hsa-mir-220-prec	miR-220	0.183936	1.338	6.62576	6.97464	0.785193
hsa-mir-031-prec	miR-31	0.183966	1.338	7.3576	7.73382	0.770452
hsa-mir-527No1	miR-518a-5p	0.188627	1.324	4.85129	5.0011	0.901374
hsa-mir-001b-1-prec1	miR-1	0.192049	1.314	7.69552	8.13848	0.735622
hsa-mir-132-precNo1	miR-132	0.196426	1.301	9.27415	9.63968	0.776184
hsa-mir-508No2	miR-508-5p	0.198144	1.296	4.6151	4.65857	0.970318
Hcd660 right	miR-876-5p	0.201956	1.285	5.07675	5.33498	0.836112
hsa-mir-125a-precNo1	miR-125a-5p	0.206233	1.272	11.5378	11.8875	0.784736
hsa-mir-412No1	miR-412	0.209708	1.263	7.60666	7.88532	0.824356
Hcd254_HPR171 right	miR-551b*	0.214491	1.249	5.27534	5.49267	0.860155
hsa-mir-425No1	miR-425*	0.215476	-1.247	7.34397	7.04373	1.23135
hsa-mir-010b-precNo1	miR-10b	0.21854	-1.238	9.28785	8.29762	1.98651
hsa-miR-373*No1	miR-373*	0.219037	-1.237	11.0229	10.6887	1.26068
hsa-mir-026a-precNo1	miR-26a	0.222813	1.227	14.5447	14.7983	0.838807
hsa-mir-302cNo2	miR-302c*	0.223922	1.224	4.89948	5.21575	0.803143
hsa-mir-302dNo2	miR-302d*	0.232191	1.202	5.25007	5.71282	0.725604
hsa-mir-147-prec	miR-147	0.235069	-1.195	6.89156	6.65556	1.17772
hsa-mir-009-1No1	miR-9	0.235693	1.193	13.9625	14.4692	0.703861
hsa-mir-520a*	miR-520a-5p	0.236566	1.191	4.80364	4.9504	0.903276
hsa-mir-505No1	miR-505	0.244704	1.17	6.40494	6.74642	0.789232
hsa-mir-16-1No2	miR-16-1*	0.244828	-1.17	5.31281	5.10174	1.15755
hsa-mir-1-1No1	miR-1	0.246076	1.167	6.70286	7.14473	0.736178
hsa-mir-519c	miR-519c-3p	0.247763	1.163	4.63768	4.67792	0.972496
hsa-mir-500No1	miR-500*	0.247886	1.162	6.75505	7.11291	0.780323
hsa-mir-526a-1No1	miR-518d-5p	0.248875	1.16	4.64463	4.73535	0.939055
hsa-mir-009-3No2	miR-9*	0.249624	1.158	12.9854	13.3553	0.773868
hsa-mir-517b*	miR-517*	0.249901	-1.157	6.94202	6.27124	1.59193
hsa-mir-009-3No1	miR-9	0.252956	1.15	14.2689	14.7435	0.719639
hsa-mir-519a-1/526c	miR-518e*	0.253985	1.147	4.9367	5.19742	0.834673
hsa-mir-030c-prec	miR-30c	0.254447	1.146	13.1839	13.4068	0.856832
hsa-mir-030a-precNo1	miR-30a	0.25478	1.146	12.5824	12.848	0.831833
hsa-mir-155-prec	miR-155	0.263446	-1.125	9.67246	9.39301	1.21373
hsa-mir-101-2No1	miR-101	0.267261	-1.116	5.46913	5.17336	1.22754
hsa-mir-520eNo1	miR-520e	0.268187	-1.114	5.73282	5.51951	1.15935
hsa-mir-498No1	miR-498	0.270519	-1.108	10.4385	10.1509	1.22063
hsa-mir-009-2No2	miR-9*	0.27094	1.107	12.595	13.0829	0.713071
hsa-mir-015b-precNo2	miR-15b*	0.273726	-1.101	6.99989	6.62651	1.29539
hsa-mir-143-prec	miR-143	0.275774	-1.096	7.47973	7.1161	1.28666
hsa-mir-335No2	miR-335*	0.27603	-1.095	9.72141	9.44298	1.21288
hsa-mir-125b-2-precNo1	miR-125b-2*	0.276418	-1.095	7.24503	6.85452	1.31086
hsa-mir-516-35p	miR-516b	0.285028	1.075	5.89714	6.14753	0.840671
hsa-mir-030b-precNo1	miR-30b	0.28924	1.066	12.8954	13.1281	0.851004
hsa-mir-519b/526c	miR-518e*	0.292984	1.057	4.61333	4.64903	0.97556
hsa-mir-362No1	miR-362-5p	0.295844	-1.051	6.11644	5.73287	1.30457
hsa-mir-151-prec	miR-151-3p	0.297868	1.047	7.802	8.16456	0.777787
hsa-mir-141-precNo1	miR-141	0.299138	1.044	6.72525	6.95142	0.854898
hsa-mir-518a-2*	miR-518a-5p	0.300388	-1.041	6.47543	6.21482	1.19799
hsa-mir-30c-1No1	miR-30c	0.308629	1.023	11.858	12.1231	0.832175
hsa-mir-513-1No2	miR-513-3p	0.310642	1.019	4.61475	4.64903	0.97652
hsa-mir-423No1	miR-423-3p	0.3159	-1.008	8.79533	8.41799	1.29894
hsa-mir-192-2/3No1	miR-192	0.317244	-1.005	10.8988	10.7348	1.12039
Hcd101_HPR160 right	miR-455-5p	0.319427	-1.001	5.4591	5.21172	1.18705
hsa-mir-199a-2-prec	miR-199a-5p	0.322006	-0.995	6.90128	6.44691	1.37019
hsa-mir-187-precNo1	miR-187	0.324336	-0.991	7.76956	7.3964	1.29518
hsa-mir-181dNo1	miR-181d	0.326959	-0.985	13.1992	12.897	1.23307
hsa-mir-010a-precNo1	miR-10a	0.328322	-0.982	10.9036	10.4622	1.35794
hsa-mir-330No1	miR-330-3p	0.328916	0.981	7.57245	7.86816	0.814674
hsa-mir-511-2No1	miR-511	0.329357	0.98	4.70515	4.77629	0.951881
hsa-mir-009-1No2	miR-9*	0.329658	0.98	12.5875	12.924	0.791938
hsa-mir-483No1	miR-483-3p	0.330819	-0.977	11.8979	11.6771	1.16541
hsa-mir-518e/526c	miR-518e*	0.333029	0.973	4.61584	4.64903	0.97726
hsa-mir-009-2No1	miR-9	0.335675	0.968	13.93	14.389	0.727474
hsa-mir-371No2	miR-371-5p	0.342994	0.953	7.79581	7.98854	0.874945
hsa-mir-519b	miR-519b-3p	0.345032	0.949	4.75836	4.8602	0.931846
hsa-mir-195-prec	miR-195	0.353192	-0.933	11.8046	11.557	1.18722
hsa-mir-515-15p	miR-515-5p	0.355531	0.928	5.28717	5.55852	0.82854
Hcd244 right	miR-760	0.356214	0.927	6.18423	6.41989	0.849295
hsa-mir-518a-1	miR-518a-3p	0.357906	-0.924	4.916	4.80189	1.0823
HPR227 left	miR-301b	0.362185	-0.915	5.78046	5.5636	1.1622
hsa-let-7a-3-prec	let-7a	0.364614	0.911	11.899	12.1655	0.831344
hsa-mir-222-precNo1	miR-222	0.365172	0.91	9.15638	9.48109	0.798457
hsa-mir-141-precNo2	miR-141*	0.37178	-0.897	5.28011	5.12815	1.11107
hsa-mir-377No2	miR-377*	0.374476	-0.892	5.99516	5.78847	1.15403
hsa-mir-485-3p	miR-485-3p	0.376667	0.888	7.17148	7.44547	0.827029
hsa-mir-516-43p	miR-516a-3p	0.377725	-0.886	5.68595	5.24743	1.35521
hsa-let-7c-prec	let-7c	0.378034	0.886	12.6875	12.9664	0.824215
HPR268 left	miR-18b	0.383182	-0.876	5.04799	4.86438	1.13572
hsa-mir-520d*	miR-520d-5p	0.38461	0.873	4.69385	4.79129	0.93469
hsa-mir-512-1&23p	miR-512-3p	0.385178	0.872	4.62735	4.66267	0.975815
hsa-mir-520c	miR-520c-3p	0.385335	0.872	4.68922	4.78844	0.933538
hsa-mir-362No2	miR-362-3p	0.388473	-0.866	6.15627	5.92435	1.17439
hsa-mir-520fNo1	miR-520f	0.389342	0.865	4.61931	4.64903	0.979615
hsa-mir-377No1	miR-377	0.389456	0.864	9.61655	9.88742	0.828822
hsa-mir-485-5p	miR-485-5p	0.389826	0.864	5.2864	5.46556	0.883217
hsa-mir-425No2	miR-425	0.390676	-0.862	9.13093	8.80029	1.25758
Hcd43 8right	miR-671-3p	0.393504	-0.857	4.82067	4.68706	1.09704
hsa-mir-502No1	miR-502-5p	0.394035	-0.856	6.3686	6.0754	1.22536
hsa-mir-027a-prec	miR-27a	0.394251	0.856	9.78549	10.0496	0.832691
hsa-mir-515-25p	miR-515-5p	0.395867	0.853	4.64506	4.69119	0.968526
Hcd210_HPR205 right	miR-543	0.400367	0.845	9.83906	10.1211	0.822412
hsa-mir-136-precNo1	miR-136*	0.402662	-0.841	6.01679	5.72835	1.22131
hsa-mir-191-prec	miR-191	0.406013	-0.835	12.5681	12.3994	1.12409
hsa-mir-032-precNo1	miR-32*	0.406946	0.833	8.13011	8.32422	0.874115
hsa-miR-302b*No1	miR-302b*	0.407304	0.832	7.28616	7.64173	0.781562
hsa-mir-516-33p	miR-516a-3p	0.409152	0.829	4.62618	4.65462	0.980481
hsa-mir-340No2	miR-340	0.410384	-0.827	11.7619	11.4492	1.24204
hsa-miR-324-5pNo1	miR-324-5p	0.414894	0.819	9.222	9.35635	0.91108
hsa-mir-101-1/2-precNo1	miR-101*	0.415188	-0.818	9.23505	8.96881	1.20267
hsa-mir-338No1	miR-338-3p	0.416719	0.816	8.63299	8.88353	0.840582
hsa-mir-516-2No1	miR-516a-3p	0.420951	-0.808	4.77917	4.69733	1.05837
hsa-mir-450-1	miR-450a	0.42793	-0.796	6.23598	6.03878	1.14647
hsa-mir-153-1-prec1	miR-153	0.42869	-0.795	5.86879	5.67745	1.14182
hsa-mir-501No1	miR-501-5p	0.433887	-0.786	5.64792	5.41911	1.17187
hsa-mir-501No2	miR-501-3p	0.433914	-0.786	5.60836	5.41906	1.14021
hsa-mir-523	miR-523	0.435649	0.783	4.61943	4.64903	0.979695
Hcd371 left	miR-708	0.439542	-0.776	7.10493	6.76354	1.26697
hsa-mir-503No1	miR-503	0.443934	0.769	5.65292	5.82789	0.885781
hsa-mir-200a-prec	miR-200b	0.443975	-0.769	5.45532	5.30418	1.11045
hsa-mir-494No1	miR-494	0.444684	-0.767	12.4265	12.1799	1.18645
Hcd350 left	miR-374b	0.464468	0.734	8.56028	9.03794	0.71814
Hcd254_HPR171 left	miR-551b	0.464846	-0.734	6.67396	6.48794	1.13762
hsa-mir-519e	miR-519e	0.468041	-0.729	4.85103	4.7619	1.06372
hsa-mir-148bNo1	miR-148b	0.476272	-0.715	7.96355	7.6148	1.27346
hsa-mir-520c/526a	miR-518d-5p	0.478931	0.711	4.69234	4.76078	0.953665
hsa-mir-26a-1No2	miR-26a-1*	0.482252	0.705	8.97944	9.26567	0.820045
hsa-mir-378No1	miR-378*	0.487828	-0.696	5.65297	5.5059	1.10732
hsa-let-7a-1-prec	let-7a	0.489996	0.693	12.3817	12.5394	0.896425
hsa-mir-451No1	miR-451	0.490777	0.692	11.0378	11.3599	0.799887
hsa-mir-363No2	miR-363*	0.494943	0.685	7.12487	7.27739	0.899679
hsa-mir-181b-precNo2	miR-181a*	0.49508	0.685	6.46578	6.71997	0.83846
hsa-mir-190-prec	miR-190	0.495663	0.684	6.15633	6.35606	0.870712
Hcd216 left	miR-668	0.507357	0.665	5.16332	5.28685	0.917941
hsa-mir-181c-precNo1	miR-181c	0.507557	0.665	11.5382	11.7742	0.849082
hsa-mir-182-precNo1	miR-182*	0.508545	-0.664	6.35382	6.09339	1.19784
hsa-let-7a-2-precNo2	let-7a	0.509413	0.662	12.4481	12.6396	0.875697
hsa-mir-361No1	miR-361-5p	0.511745	-0.659	12.291	12.1133	1.1311
hsa-mir-204-precNo1	miR-204	0.514462	0.654	11.7253	12.3242	0.660246
hsa-mir-007-1-prec	miR-7	0.515514	0.653	8.24045	8.42873	0.877656
hsa-mir-424No2	miR-424*	0.51905	0.647	5.54535	5.6907	0.904158
HPR158 left	miR-452	0.519469	-0.646	4.80339	4.68473	1.08573
hsa-mir-301No1	miR-301a	0.529607	-0.631	5.3082	5.13405	1.1283
hsa-mir-106aNo2	miR-106a*	0.531523	0.628	5.26574	5.41717	0.900354
hsa-mir-455No2	miR-455-3p	0.531902	-0.627	7.28032	6.90212	1.29973
hsa-mir-29b-1No2	miR-29b-1*	0.532751	0.626	6.33282	6.50805	0.885625
hsa-mir-373No1	miR-373	0.534087	0.624	6.49224	6.65561	0.892941
hsa-mir-320No1	miR-320	0.538794	0.617	12.2751	12.4104	0.910451
hsa-mir-30c-2No2	miR-30c-2*	0.539622	-0.616	7.86619	7.76612	1.07183
hsa-let-7iNo2	let-7i*	0.546372	-0.605	5.95743	5.83554	1.08816
hsa-mir-488No1	miR-488*	0.549108	0.601	5.46725	5.58688	0.920428
hsa-mir-101-1No2	miR-101*	0.549639	-0.6	5.01691	4.93783	1.05634
hsa-mir-367No2	miR-367*	0.551072	0.598	4.62229	4.64903	0.981641
hsa-mir-524	miR-524-3p	0.553592	0.594	4.96233	5.05444	0.938151
hsa-mir-510No1	miR-510	0.55467	0.593	4.75095	4.8216	0.952213
hsa-mir-519a-1	miR-519a	0.557304	-0.589	4.76826	4.72395	1.03119
hsa-mir-193bNo1	miR-193b	0.559936	-0.585	7.37262	7.15738	1.1609
hsa-let-7b-prec	let-7b	0.562678	0.581	13.2984	13.4278	0.914211
hsa-mir-221-prec	miR-221	0.56403	0.579	9.42283	9.69011	0.830882
hsa-mir-027b-prec	miR-27b	0.564597	0.578	9.08696	9.34491	0.836273
hsa-mir-490No1	miR-490-3p	0.565487	0.577	4.64064	4.66901	0.980528
hsa-let-7d-prec	let-7d	0.566026	0.576	11.6718	11.8406	0.889558
hsa-mir-223-prec	miR-223	0.567571	0.574	10.0985	10.3698	0.828574
hsa-mir-384	miR-384	0.573101	0.565	4.62364	4.64903	0.982558
hsa-mir-371No1	miR-371-3p	0.573208	-0.565	11.8304	11.6592	1.12603
hsa-mir-30c-2No1	miR-30c	0.575627	0.562	12.8639	12.9912	0.915561
Hcd101_HPR160 left	miR-455-3p	0.583592	-0.55	5.87917	5.68968	1.14036
hsa-mir-519dNo1	miR-519d	0.590918	0.539	5.08771	5.18008	0.937985
Hcd50_HPR142 left	miR-802	0.594892	0.534	4.62379	4.64903	0.982659
hsa-mir-140No2	miR-140-3p	0.597355	0.53	10.3452	10.502	0.89702
hsa-mir-521-2No1	miR-521	0.601029	0.525	4.65194	4.67322	0.98536
hsa-mir-030b-precNo2	miR-30b*	0.602226	-0.523	8.58536	8.49967	1.06119
hsa-mir-208-prec	miR-208	0.60419	-0.52	5.33708	5.21984	1.08466
hsa-mir-325No1	miR-325	0.605018	0.519	6.56694	6.73272	0.891446
hsa-mir-200cNo1	miR-200c	0.608618	0.514	5.20523	5.31943	0.923894
hsa-mir-181b-1No1	miR-181b	0.608864	-0.513	13.8419	13.6992	1.10392
hsa-mir-424No1	miR-424	0.608933	0.513	6.24465	6.37063	0.916387
hsa-mir-517c	miR-517c	0.610182	0.511	4.7509	4.82183	0.952028
hsa-mir-337No2	miR-337-5p	0.610859	0.51	5.36436	5.50494	0.907155
hsa-mir-516-1No1	miR-516a-3p	0.611057	0.51	5.15117	5.23642	0.942624
hsa-mir-302cNo1	miR-302c	0.611926	0.509	4.77445	4.86179	0.941254
hsa-mir-153-2-prec	miR-153	0.613847	-0.506	5.2673	5.16404	1.0742
Hcd311 left	miR-875-3p	0.614081	0.506	4.71553	4.76634	0.965391
hsa-miR-324-5pNo2	miR-324-3p	0.614328	0.506	8.09098	8.17104	0.946019
hsa-mir-211-precNo1	miR-211	0.614555	0.505	10.5305	10.9425	0.75157
hsa-mir-508No1	miR-508-3p	0.615742	0.504	4.73981	4.80171	0.958003
hsa-miR-302b*No2	miR-302b	0.616612	0.502	4.82878	4.88439	0.962186
hsa-mir-107-prec-10	miR-107	0.618099	0.5	13.832	13.9416	0.926842
hsa-mir-517a	miR-517a	0.623552	0.492	4.75941	4.85575	0.935405
hsa-mir-101-1No1	miR-101	0.624358	-0.491	5.88044	5.72234	1.11581
hsa-mir-215-precNo1	miR-215	0.626588	0.488	9.39819	9.59241	0.874049
hsa-mir-105-prec-X.1=105-1	miR-105	0.631979	-0.48	7.2304	7.08515	1.10592
hsa-mir-513-2No2	miR-513-3p	0.635134	0.476	5.36711	5.49124	0.917556
hsa-mir-370No1	miR-370	0.635241	-0.476	9.41291	9.22711	1.13745
hsa-mir-098-prec-X	miR-98	0.635608	0.475	7.10942	7.24688	0.909119
hsa-mir-033b-prec	miR-33b	0.636074	-0.475	7.81178	7.72561	1.06155
hsa-mir-030a-precNo2	miR-30a*	0.637133	0.473	8.45476	8.61681	0.893755
hsa-mir-196-1-precNo1	miR-196a	0.641608	-0.467	7.69611	7.56153	1.09778
hsa-mir-523/526c	miR-518e*	0.642236	0.466	4.62899	4.65507	0.982088
hsa-mir-513-2No1	miR-513-5p	0.648372	-0.457	5.79566	5.69997	1.06857
hsa-mir-302aNo1	miR-302a	0.64844	0.457	5.08937	5.15549	0.955202
hsa-mir-302aNo2	miR-302a*	0.65548	0.448	5.1261	5.22057	0.936615
hsa-mir-092-prec-13=092-1No1	miR-92a-1*	0.66166	-0.439	7.42869	7.35071	1.05554
hsa-mir-122a-prec	miR-122	0.665789	-0.433	10.3227	10.2539	1.04884
hsa-mir-214-prec	miR-214	0.668665	-0.429	9.93871	9.81016	1.09319
hsa-mir-023b-prec	miR-23b	0.668739	-0.429	14.018	13.9181	1.07172
Hcd214 left	miR-544	0.675987	-0.419	5.10329	5.02777	1.05374
hsa-mir-100No2	miR-100*	0.684683	0.407	4.62912	4.64903	0.986298
hsa-mir-296No1	miR-296-5p	0.692686	0.396	7.66656	7.74518	0.946959
hsa-mir-107No1	miR-107	0.692956	0.396	13.4486	13.5241	0.949061
hsa-mir-520bNo1	miR-520c-3p	0.697244	0.39	4.62695	4.64903	0.984813
hsa-mir-015a-2-precNo2	miR-15a*	0.697275	0.39	6.26446	6.34328	0.94683
hsa-mir-125b-1	miR-125b	0.703112	-0.382	14.0709	13.9588	1.08075
hsa-mir-324No1	miR-324-3p	0.705679	-0.379	6.98913	6.89744	1.06562
Hcd350 right	miR-374b*	0.708032	0.376	4.75112	4.7859	0.97618
hsa-mir-518f	miR-518f	0.71199	0.37	4.62779	4.64903	0.985391
hsa-mir-516-2No2	miR-516a-5p	0.71896	0.361	4.65437	4.67081	0.988669
hsa-mir-422aNo1	miR-422a	0.721154	0.358	5.83638	5.9411	0.929985
Hcd972 left	miR-542-3p	0.721265	0.358	4.74113	4.78395	0.970752
hsa-mir-030d-precNo2	miR-30d	0.724531	0.353	13.5576	13.6427	0.942733
hsa-mir-525	miR-525-5p	0.727855	0.349	5.11434	5.16745	0.963858
hsa-mir-500No2	miR-500	0.728391	-0.348	8.00884	7.89481	1.08225
hsa-mir-518dNo2	miR-518d-3p	0.732614	0.343	4.6303	4.64903	0.987101
hsa-mir-186-prec	miR-186	0.73393	-0.341	8.26637	8.13946	1.09195
hsa-mir-518e	miR-518e	0.739732	-0.333	4.67985	4.64903	1.02159
hsa-mir-194-1No1	miR-194	0.740391	0.332	6.86906	6.97575	0.928718
hsa-mir-145-prec	miR-145	0.741322	0.331	10.4675	10.5538	0.941895
hsa-mir-361No2	miR-361-3p	0.74744	0.323	8.01402	8.07195	0.960641
hsa-mir-034-precNo2	miR-34a*	0.748239	-0.322	8.67007	8.56345	1.07671
hsa-mir-010b-precNo2	miR-10b*	0.748644	0.321	8.29568	8.41688	0.919422
hsa-mir-206-precNo1	miR-206	0.748707	0.321	10.0639	10.1266	0.957501
hsa-mir-524*	miR-524-5p	0.751434	-0.318	4.961	4.9232	1.02655
hsa-mir-144-precNo1	miR-144	0.75215	-0.317	5.68101	5.5769	1.07483
hsa-mir-007-2-precNo2	miR-7	0.752284	0.317	8.98766	9.0596	0.951361
hsa-mir-100-1/2-prec	miR-100	0.757637	-0.309	13.3165	13.2435	1.05188
hsa-mir-007-3-precNo2	miR-7	0.75955	0.307	7.06039	7.17843	0.921437
hsa-mir-139-prec	miR-139-5p	0.76785	0.296	7.64161	7.79103	0.901612
hsa-mir-376aNo2	miR-376a*	0.768161	-0.296	4.68082	4.64903	1.02228
hsa-mir-299No2	miR-299-3p	0.773283	-0.289	4.73998	4.71921	1.0145
hsa-mir-192No2	miR-192*	0.773302	0.289	5.16602	5.21227	0.968448
hsa-mir-199b-precNo2	miR-199b-5p	0.774734	-0.287	6.99124	6.88147	1.07906
hsa-mir-484	miR-484	0.775379	0.286	10.6475	10.7353	0.940976
hsa-mir-123-precNo1	miR-126*	0.777806	0.283	11.4485	11.5532	0.930042
Hcd88_HPR103 right	miR-582-5p	0.777909	-0.283	4.67271	4.64903	1.01655
hsa-mir-302bNo1	miR-302b	0.783806	-0.275	4.71858	4.6937	1.0174
hsa-mir-449No1	miR-449a	0.784877	0.274	6.49485	6.56087	0.955274
hsa-mir-521-1No1	miR-521	0.784972	-0.274	4.78492	4.75425	1.02149
hsa-mir-198-prec	miR-198	0.791363	0.265	9.06781	9.10054	0.977566
hsa-mir-518c*	miR-518c*	0.793714	0.262	5.19503	5.23832	0.97044
hsa-mir-514-1No1	miR-514	0.796534	-0.259	5.43787	5.38129	1.04
hsa-mir-520hNo1	miR-520g	0.797853	0.257	4.63433	4.64903	0.989866
Hcd37_HPR114 left	miR-190b	0.798049	-0.257	7.44724	7.3574	1.06425
hsa-mir-224-prec	miR-224	0.802826	0.25	6.06564	6.17726	0.925545
hsa-mir-194-2No2	miR-194*	0.804533	-0.248	5.74423	5.6944	1.03514
hsa-mir-100No1	miR-100	0.806145	-0.246	12.7242	12.6476	1.05447
hsa-mir-024-2-prec	miR-24	0.809032	0.242	11.7064	11.8045	0.93426
hsa-mir-21No2	miR-21*	0.810529	-0.24	5.08174	5.03734	1.03126
hsa-mir-526b*	miR-526b*	0.811113	0.24	5.04512	5.11448	0.953062
hsa-mir-185-precNo1	miR-185	0.811663	-0.239	8.44745	8.42186	1.0179
hsa-mir-515-23p	miR-515-3p	0.81694	0.232	5.34701	5.39678	0.966087
hsa-mir-378No2	miR-378	0.818976	-0.229	7.2172	7.12915	1.06294
hsa-mir-519a-2No1	miR-519a	0.819257	-0.229	4.67799	4.66534	1.00881
hsa-mir-517b	miR-517a	0.825153	-0.222	4.66926	4.64903	1.01412
hsa-mir-450-2No1	miR-450a	0.830499	-0.215	4.92304	4.87821	1.03156
hsa-mir-20bNo2	miR-20b*	0.831291	-0.214	4.66183	4.64903	1.00891
hsa-mir-029a-2No2	miR-29a*	0.831425	0.213	9.29042	9.34084	0.965654
Hcd660 left	miR-876-3p	0.831458	-0.213	8.64785	8.59579	1.03675
hsa-mir-516-1No2	miR-516a-5p	0.837649	-0.205	4.88656	4.85815	1.01988
hsa-mir-490No2	miR-490-5p	0.83824	0.205	4.64026	4.64903	0.993945
hsa-mir-188-prec	miR-188-5p	0.838818	-0.204	6.56841	6.51813	1.03547
hsa-mir-452	miR-452	0.839352	-0.203	6.06774	5.9985	1.04917
hsa-mir-367No1	miR-367	0.841803	0.2	7.77587	7.86025	0.943186
hsa-mir-34aNo2	miR-34a*	0.845854	-0.195	4.91891	4.88961	1.02051
hsa-mir-135bNo2	miR-135b*	0.85064	-0.189	6.23106	6.19065	1.02841
hsa-mir-504No1	miR-504	0.852232	-0.187	5.05277	5.02702	1.01801
hsa-mir-184-precNo1	miR-184	0.852479	0.186	5.37307	5.41321	0.972561
hsa-mir-196-2-precNo2	miR-196a	0.855317	-0.183	8.19642	8.14239	1.03816
hsa-mir-181b-2No1	miR-181b	0.857453	-0.18	14.2202	14.1766	1.03066
hsa-mir-123-precNo2	miR-126	0.861267	0.175	9.02894	9.08174	0.964064
hsa-mir-518c	miR-518c	0.864889	0.171	4.65387	4.66439	0.992739
hsa_mir_490_Hcd20 right	miR-490-5p	0.875255	-0.157	4.68247	4.67398	1.0059
hsa-mir-517*	miR-517*	0.880679	0.151	4.73296	4.76135	0.980516
hsa-mir-516-45p	miR-516b	0.881161	0.15	7.42138	7.45915	0.974158
hsa-mir-492No1	miR-492	0.887621	0.142	4.66366	4.67097	0.994949
hsa-mir-520d	miR-520d-3p	0.887844	-0.141	4.949	4.93212	1.01177
hsa-mir-522	miR-522	0.891696	-0.137	4.66026	4.64903	1.00782
hsa-mir-095-prec-4	miR-95	0.891777	0.136	8.04712	8.08334	0.975206
hsa-mir-192-2/3No2	miR-192*	0.892161	-0.136	6.07858	6.04372	1.02446
hsa-mir-34cNo1	miR-34c-5p	0.894604	-0.133	4.90501	4.87834	1.01866
hsa-mir-511-1No1	miR-511	0.898494	0.128	4.67852	4.68855	0.993069
hsa-mir-509No2	miR-509-5p	0.905486	0.119	4.69258	4.6992	0.995422
hsa-mir-105-2No1	miR-105	0.905619	0.119	9.13973	9.18434	0.969546
hsa-mir-103-prec-5=103-1	miR-103	0.905771	-0.119	14.1064	14.0848	1.01505
hsa-mir-132-precNo2	miR-132*	0.905907	-0.119	7.70064	7.6705	1.02111
hsa-mir-369No2	miR-369-5p	0.910163	0.113	6.10387	6.14825	0.96971
hsa-mir-340No1	miR-340*	0.911226	0.112	4.79621	4.81092	0.989853
hsa-mir-193bNo2	miR-193b*	0.912798	-0.11	5.73646	5.70468	1.02227
hsa-mir-213-precNo1	miR-181b	0.91363	-0.109	13.8143	13.7877	1.01861
hsa-mir-519e*	miR-519e*	0.918846	-0.102	6.58603	6.56268	1.01632
hsa-mir-342No1	miR-342-3p	0.920584	-0.1	14.8935	14.8754	1.01266
hsa-mir-199a-1-prec	miR-199a-5p	0.921508	0.099	6.33295	6.3805	0.967576
hsa-mir-146-prec	miR-146a	0.922586	0.097	9.87419	9.90835	0.976601
Hcd351_HPR119 left	miR-421	0.925122	0.094	4.85057	4.86094	0.992838
hsa-mir-136-precNo2	miR-136	0.929108	-0.089	9.18269	9.16508	1.01228
hsa-mir-374No1	miR-374a	0.931549	0.086	8.91598	8.95775	0.971459
hsa-mir-502No2	miR-502-3p	0.933325	-0.084	6.03448	6.01275	1.01517
hsa-mir-335No1	miR-335	0.93337	0.084	8.2391	8.27356	0.976397
hsa-mir-4323p	miR-432*	0.933804	0.083	4.70175	4.70678	0.996518
hsa-mir-192No1	miR-192	0.934749	-0.082	10.2706	10.2437	1.01882
hsa-mir-520gNo1	miR-520g	0.939403	-0.076	4.66023	4.65507	1.00359
hsa-mir-452*	miR-452*	0.942648	0.072	4.69299	4.70024	0.994988
hsa-mir-26a-2No2	miR-26a-2*	0.947396	0.066	6.51151	6.52646	0.989694
hsa-mir-125b-2-precNo2	miR-125b	0.951007	0.062	13.7604	13.7771	0.988476
hsa-mir-493No1	miR-493*	0.952035	-0.06	6.14862	6.1326	1.01116
hsa-mir-202-prec	miR-202	0.953164	-0.059	6.97812	6.96106	1.01189
hsa-mir-365-1No1	miR-365	0.953446	0.059	5.56099	5.58219	0.985409
hsa-mir-302dNo1	miR-302d	0.95691	-0.054	4.78171	4.77599	1.00398
hsa-mir-448No1	miR-448	0.958503	-0.052	7.50074	7.49108	1.00672
HPR158 right	miR-452*	0.958694	0.052	4.6451	4.64903	0.997284
hsa-miR-373*No2	miR-373	0.959671	0.051	6.11305	6.12581	0.991194
hsa-mir-526b	miR-526b	0.962126	0.048	4.75009	4.75411	0.997213
hsa-mir-505No2	miR-505*	0.96416	0.045	5.44156	5.45079	0.99362
hsa-mir-514-2&3No1	miR-514	0.96943	-0.038	4.97362	4.96793	1.00395
hsa-mir-483No2	miR-483-5p	0.970009	-0.038	5.92165	5.91191	1.00677
hsa-miR-302c*No2	miR-302c	0.972734	-0.034	4.6513	4.64903	1.00158
hsa-mir-146bNo1	miR-146b-5p	0.977887	0.028	9.77218	9.78368	0.992062
hsa-mir-526a-2No1	miR-518d-5p	0.982442	0.022	4.64674	4.64903	0.998419
hsa-mir-194-precNo1	miR-194	0.982449	0.022	7.06563	7.0709	0.99635
hsa-mir-455No1	miR-455-5p	0.985703	-0.018	5.85896	5.85334	1.0039
hsa-mir-024-1-precNo1	miR-24	0.985938	0.018	11.6898	11.6963	0.995508
hsa-mir-518f*	miR-518f*	0.986267	-0.017	4.65051	4.64903	1.00103
hsa_mir_147 left	miR-147	0.986408	0.017	7.44122	7.44569	0.996911
hsa-mir-023a-prec	miR-23a	0.990409	0.012	14.1664	14.1693	0.997973
